# Supplementary material for: Are inequities decreasing? Birth registration for children under five in low-income and middle-income countries, 1999–2016
Source: PubMed Central journal article supplement (PMC6936526; doi:10.1136/bmjgh-2019-001926), 2019-12-16
Supplement: bmjgh-2019-001926supp001.pdf [file bmjgh-2019-001926supp001.pdf]

## Supplementary Material

### **Are inequities decreasing? Birth registration for children under five in low- and middle-income countries, 1999 to 2016**

#### ***Figure***

Figure S1: Countries and surveys included in the sample stratified by region and (a) World Bank income group and (b) survey wave

#### ***Tables***

Table S1: Description of birth registration questions in MICS and DHS Surveys (1999-2016)

Table S2: Change in the percentage of children under five whose birth is not registered in 67 countries (1999-2016)

Table S3: Change in wealth inequalities in the percentage of children under five whose birth is not registered in 67 countries (1999-2016)

Table S4: Change in urban/rural inequalities in the percentage of children under five whose birth is not registered in 67 countries (1999-2016)

**Figure S1: Countries and surveys included in the sample stratified by region and (a) World Bank income group and (b) survey wave**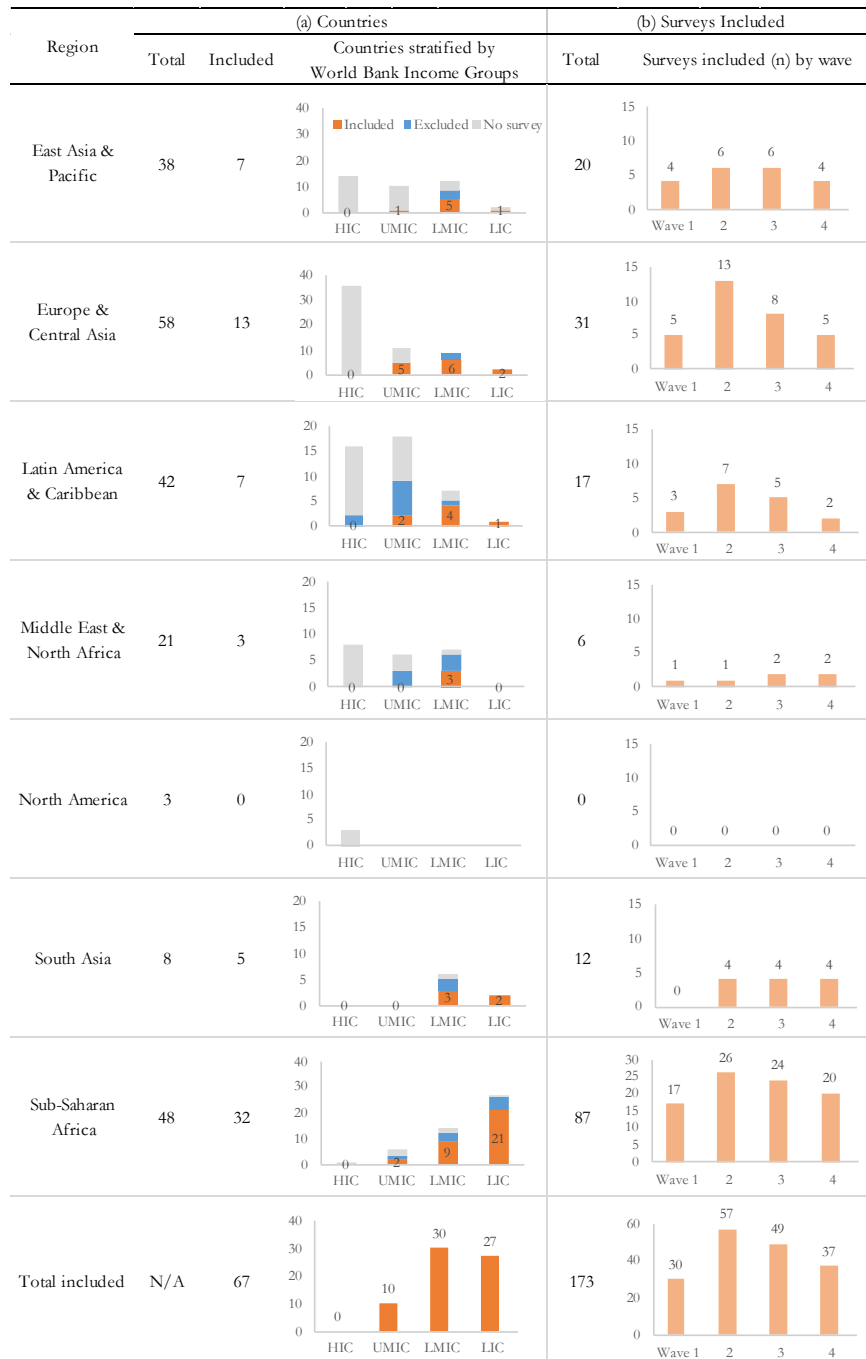

Table shows (a) the total number of countries with available data and the sample of countries stratified by region and income group which meet the inclusion criteria (two or more surveys with data on birth registration; covariate data on: sex of the child, household wealth quintiles, urban/rural residence; and, survey weights) and (b) surveys included by survey wave stratified by region. Survey waves defined as: Wave 1 (<2004); Wave 2 (2004-2007); Wave 3 (2009-2012); Wave 4 (2013+)

World Bank regional classifications used to group countries. World Bank Income Groups include: High Income (HIC), Low income (LIC), Lower-middle income (LMIC), Upper-middle income (UMIC). For countries without surveys, the 2017 World Bank Income Group was used. For countries with surveys, the World Bank Income Group is at the time of the most recent survey.

**Table S1: Description of birth registration questions in MICS and DHS Surveys (1999-2016)****DHS****Household questionnaire Phase 5 (2003-2008)**

IF AGE 0-4 YEARS

Has (NAME)'s birth ever been registered with the civil authority?

1 = HAS CERTIFICATE

2 = REGISTERED

3 = NEITHER

8 = DON'T KNOW

**Household questionnaire Phase 6 (2008-2013)**

IF AGE 0-4 YEARS

Does (NAME) have a birth certificate?

IF NO, PROBE:

Has (NAME)'s birth ever been registered with the civil authority?

1 = HAS CERTIFICATE

2 = REGISTERED

3 = NEITHER

8 = DON'T KNOW

**Household questionnaire Phase 6 (2003-2018)**

IF AGE 0-4 YEARS

Does (NAME) have a birth certificate?

IF NO, PROBE:

Has (NAME)'s birth ever been registered with the civil authority?

1 = HAS CERTIFICATE

2 = REGISTERED

3 = NEITHER

8 = DON'T KNOW

**MICS 2**

|                                                                                                                                                                                                                                                                                 |                                                                           |                |
|---------------------------------------------------------------------------------------------------------------------------------------------------------------------------------------------------------------------------------------------------------------------------------|---------------------------------------------------------------------------|----------------|
| 4. DOES (name) HAVE A BIRTH CERTIFICATE?<br>MAY I SEE IT?<br><br><i>If certificate is presented, verify reported birth date.<br/>If no birth certificate is presented, try to verify date using another document (health card, etc.).<br/>Correct stated age, if necessary.</i> | Yes, seen ..... 1<br>Yes, not seen ..... 2<br>No ..... 3<br><br>DK..... 9 | 1⇒Q.8          |
| 5. <i>If no birth certificate is shown, ask:</i><br><br>HAS (name's) BIRTH BEEN REGISTERED?                                                                                                                                                                                     | Yes ..... 1<br>No ..... 2<br>DK..... 9                                    | 1⇒Q.8<br>9⇒Q.7 |

**MICS 3**

|                                                                                 |                     |   |       |
|---------------------------------------------------------------------------------|---------------------|---|-------|
| BR1. DOES ( <i>name</i> ) HAVE A BIRTH CERTIFICATE?<br>MAY I SEE IT?            | Yes, seen .....     | 1 | 1⇒BR5 |
|                                                                                 | Yes, not seen ..... | 2 |       |
|                                                                                 | No .....            | 3 |       |
|                                                                                 | DK.....             | 8 |       |
| BR2. HAS ( <i>name</i> 's) BIRTH BEEN REGISTERED<br>WITH THE CIVIL AUTHORITIES? | Yes .....           | 1 | 1⇒BR5 |
|                                                                                 | No .....            | 2 |       |
|                                                                                 | DK.....             | 8 | 8⇒BR4 |

**MICS 4**

|                                                                                                 |                    |   |        |
|-------------------------------------------------------------------------------------------------|--------------------|---|--------|
| BR1. DOES ( <i>name</i> ) HAVE A BIRTH CERTIFICATE?<br><br><i>If yes, ask:</i><br>MAY I SEE IT? | Yes, seen.....     | 1 | 1⇒NEXT |
|                                                                                                 | Yes, not seen..... | 2 | MODULE |
|                                                                                                 | No .....           | 3 | 2⇒NEXT |
|                                                                                                 | DK .....           | 8 | MODULE |
| BR2. HAS ( <i>name</i> )'S BIRTH BEEN REGISTERED<br>WITH THE CIVIL AUTHORITIES?                 | Yes.....           | 1 | 1⇒NEXT |
|                                                                                                 | No .....           | 2 | MODULE |
|                                                                                                 | DK .....           | 8 |        |

**MICS 5**

|                                                                                                 |                    |   |        |
|-------------------------------------------------------------------------------------------------|--------------------|---|--------|
| BR1. DOES ( <i>name</i> ) HAVE A BIRTH CERTIFICATE?<br><br><i>If yes, ask:</i><br>MAY I SEE IT? | Yes, seen.....     | 1 | 1⇒Next |
|                                                                                                 | Yes, not seen..... | 2 | Module |
|                                                                                                 | No .....           | 3 | 2⇒Next |
|                                                                                                 | DK .....           | 8 | Module |
| BR2. HAS ( <i>name</i> )'S BIRTH BEEN REGISTERED<br>WITH <i>the civil authorities</i> ?         | Yes .....          | 1 | 1⇒Next |
|                                                                                                 | No .....           | 2 | Module |
|                                                                                                 | DK .....           | 8 |        |

**Table S2: Change in the percentage of children under five whose birth is not registered in 67 countries (1999-2016)**

**Table S2: Change in the percentage of children under five whose birth is not registered in 67 countries (1999-2016)**

| Region                          | Country            | Change in % of children under five whose birth is not registered between first and most recent survey |          |                    |          |           |              |               | Percentage of children under five whose birth is not registered |          |        |                      |       | Percentage of children under five whose birth is not registered |        |                      |       |       |
|---------------------------------|--------------------|-------------------------------------------------------------------------------------------------------|----------|--------------------|----------|-----------|--------------|---------------|-----------------------------------------------------------------|----------|--------|----------------------|-------|-----------------------------------------------------------------|--------|----------------------|-------|-------|
|                                 |                    | First survey                                                                                          |          | Most recent survey |          | Change    |              |               | Wave 1 (1999-2004)                                              |          |        |                      |       | Wave 2 (2004-2008)                                              |        |                      |       |       |
|                                 |                    | Year                                                                                                  | Estimate | Year               | Estimate | Years (n) | Total change | Annual change | Year                                                            | Estimate | 95% CI | Children under 5 (n) | Year  | Estimate                                                        | 95% CI | Children under 5 (n) |       |       |
| East Asia & Pacific             | Thailand           | 2005                                                                                                  | 0.62     | 2012               | 0.48     | 7         | -0.14        | -0.02         |                                                                 |          |        |                      |       |                                                                 |        |                      |       |       |
|                                 | Mongolia           | 2000                                                                                                  | 2.38     | 2013               | 0.70     | 13        | -1.68        | -0.13         | 2000                                                            | 2.38     | 1.96   | 2.88                 | 6184  | 2005                                                            | 1.67   | 1.26                 | 2.20  | 3547  |
|                                 | Vietnam            | 2000                                                                                                  | 27.76    | 2013               | 3.94     | 13        | -23.82       | -1.83         | 2000                                                            | 27.76    | 22.90  | 33.20                | 3105  | 2006                                                            | 12.26  | 9.72                 | 15.34 | 2677  |
|                                 | Cambodia           | 2005                                                                                                  | 33.61    | 2014               | 26.69    | 9         | -6.92        | -0.77         |                                                                 |          |        |                      |       | 2005                                                            | 33.61  | 31.59                | 35.69 | 7794  |
|                                 | Myanmar            | 2000                                                                                                  | 39.35    | 2015               | 18.71    | 15        | -20.64       | -1.38         | 2000                                                            | 39.35    | 35.68  | 43.15                | 14443 |                                                                 |        |                      |       |       |
|                                 | Lao                | 2000                                                                                                  | 40.61    | 2011               | 25.24    | 11        | -15.38       | -1.40         | 2000                                                            | 40.61    | 36.38  | 44.99                | 4610  | 2006                                                            | 28.53  | 25.75                | 31.47 | 4136  |
|                                 | Indonesia          | 2007                                                                                                  | 49.36    | 2012               | 33.36    | 5         | -16.00       | -3.20         |                                                                 |          |        |                      |       | 2007                                                            | 49.36  | 47.55                | 51.17 | 16625 |
| Europe & Central Asia           | Ukraine            | 2005                                                                                                  | 0.19     | 2012               | 0.21     | 7         | 0.01         | 0.00          |                                                                 |          |        |                      |       | 2005                                                            | 0.19   | 0.06                 | 0.62  | 3049  |
|                                 | Uzbekistan         | 2000                                                                                                  | 0.48     | 2006               | 0.09     | 6         | -0.39        | -0.06         | 2000                                                            | 0.48     | 0.28   | 0.82                 | 3349  | 2006                                                            | 0.09   | 0.03                 | 0.28  | 4986  |
|                                 | Kazakhstan         | 2006                                                                                                  | 0.77     | 2015               | 0.33     | 9         | -0.45        | -0.05         |                                                                 |          |        |                      |       | 2006                                                            | 0.77   | 0.50                 | 1.18  | 4415  |
|                                 | Serbia             | 2005                                                                                                  | 1.04     | 2014               | 0.58     | 9         | -0.46        | -0.05         |                                                                 |          |        |                      |       | 2005                                                            | 1.04   | 0.70                 | 1.55  | 3687  |
|                                 | Albania            | 2000                                                                                                  | 1.17     | 2008               | 1.35     | 8         | 0.18         | 0.02          | 2000                                                            | 1.17     | 0.66   | 2.06                 | 1454  | 2008                                                            | 1.35   | 0.83                 | 2.19  | 1596  |
|                                 | Montenegro         | 2005                                                                                                  | 2.05     | 2013               | 0.59     | 8         | -1.46        | -0.18         |                                                                 |          |        |                      |       | 2005                                                            | 2.05   | 0.76                 | 5.39  | 1028  |
|                                 | Moldova            | 2000                                                                                                  | 2.13     | 2012               | 0.43     | 12        | -1.71        | -0.14         | 2000                                                            | 2.13     | 1.45   | 3.13                 | 1656  | 2005                                                            | 7.66   | 6.19                 | 9.45  | 1704  |
|                                 | Azerbaijan         | 2000                                                                                                  | 3.20     | 2006               | 6.38     | 6         | 3.18         | 0.53          | 2000                                                            | 3.20     | 2.21   | 4.62                 | 1875  | 2006                                                            | 6.38   | 4.80                 | 8.42  | 2210  |
|                                 | Armenia            | 2005                                                                                                  | 3.61     | 2010               | 0.41     | 5         | -3.20        | -0.64         |                                                                 |          |        |                      |       | 2005                                                            | 3.61   | 2.08                 | 6.21  | 1526  |
|                                 | Turkmenistan       | 2006                                                                                                  | 4.52     | 2015               | 0.42     | 9         | -4.10        | -0.46         |                                                                 |          |        |                      |       | 2006                                                            | 4.52   | 3.35                 | 6.08  | 2076  |
|                                 | Kyrgyzstan         | 2005                                                                                                  | 5.67     | 2014               | 2.27     | 9         | -3.40        | -0.38         |                                                                 |          |        |                      |       | 2005                                                            | 5.67   | 3.72                 | 8.55  | 2987  |
| Macedonia                       | 2005               | 6.19                                                                                                  | 2011     | 0.26               | 6        | -5.93     | -0.99        |               |                                                                 |          |        |                      | 2005  | 6.19                                                            | 3.97   | 9.53                 | 4547  |       |
| Tajikistan                      | 2000               | 25.43                                                                                                 | 2012     | 11.58              | 12       | -13.85    | -1.15        | 2000          | 25.43                                                           | 22.04    | 29.16  | 3535                 | 2005  | 11.74                                                           | 9.94   | 13.81                | 4273  |       |
| Latin America and the Caribbean | Suriname           | 2006                                                                                                  | 3.39     | 2010               | 1.10     | 4         | -2.29        | -0.57         |                                                                 |          |        |                      |       | 2006                                                            | 3.39   | 2.47                 | 4.64  | 2257  |
|                                 | Guyana             | 2000                                                                                                  | 3.48     | 2014               | 11.26    | 14        | 7.77         | 0.56          | 2000                                                            | 3.48     | 2.49   | 4.85                 | 2672  | 2006                                                            | 6.75   | 5.50                 | 8.26  | 2499  |
|                                 | Belize             | 2006                                                                                                  | 5.62     | 2011               | 4.76     | 5         | -0.86        | -0.17         |                                                                 |          |        |                      |       | 2006                                                            | 5.62   | 3.92                 | 8.01  | 797   |
|                                 | Honduras           | 2005                                                                                                  | 6.46     | 2011               | 6.45     | 6         | -0.01        | 0.00          |                                                                 |          |        |                      |       | 2005                                                            | 6.46   | 5.90                 | 7.06  | 11069 |
|                                 | Bolivia            | 2000                                                                                                  | 18.44    | 2008               | 24.08    | 8         | 5.64         | 0.70          | 2000                                                            | 18.44    | 16.62  | 20.40                | 3156  | 2008                                                            | 24.08  | 22.80                | 25.40 | 9118  |
|                                 | Haiti              | 2005                                                                                                  | 18.92    | 2012               | 20.25    | 7         | 1.33         | 0.19          |                                                                 |          |        |                      |       | 2005                                                            | 18.92  | 17.25                | 20.71 | 6001  |
|                                 | Dominican Rep      | 2000                                                                                                  | 25.41    | 2014               | 11.97    | 14        | -13.44       | -0.96         | 2000                                                            | 25.41    | 22.03  | 29.10                | 1993  | 2007                                                            | 22.22  | 20.72                | 23.79 | 11694 |
| Middle East & North Africa      | State of Palestine | 2010                                                                                                  | 0.69     | 2014               | 0.66     | 4         | -0.03        | -0.01         |                                                                 |          |        |                      |       |                                                                 |        |                      |       |       |
|                                 | Iraq               | 2000                                                                                                  | 1.88     | 2011               | 0.77     | 11        | -1.11        | -0.10         | 2000                                                            | 1.88     | 1.60   | 2.21                 | 14553 |                                                                 |        |                      |       |       |
|                                 | Yemen              | 2006                                                                                                  | 77.75    | 2013               | 69.30    | 7         | -8.45        | -1.21         |                                                                 |          |        |                      |       | 2006                                                            | 77.75  | 73.36                | 81.60 | 3781  |
| South Asia                      | India              | 2005                                                                                                  | 58.85    | 2015               | 20.27    | 10        | -38.58       | -3.86         |                                                                 |          |        |                      |       | 2005                                                            | 58.85  | 57.78                | 59.91 | 55896 |
|                                 | Afghanistan        | 2010                                                                                                  | 62.66    | 2015               | 57.70    | 5         | -4.96        | -0.99         |                                                                 |          |        |                      |       |                                                                 |        |                      |       |       |
|                                 | Nepal              | 2006                                                                                                  | 65.03    | 2016               | 43.79    | 10        | -21.24       | -2.12         |                                                                 |          |        |                      |       | 2006                                                            | 65.03  | 61.68                | 68.25 | 5440  |
|                                 | Pakistan           | 2006                                                                                                  | 73.42    | 2012               | 66.39    | 6         | -7.03        | -1.17         |                                                                 |          |        |                      |       | 2006                                                            | 73.42  | 71.16                | 75.56 | 8760  |
|                                 | Bangladesh         | 2006                                                                                                  | 90.15    | 2014               | 79.84    | 8         | -10.31       | -1.29         |                                                                 |          |        |                      |       | 2006                                                            | 90.15  | 89.41                | 90.85 | 31562 |

**Table S2: Change in the percentage of children under five whose birth is not registered in 67 countries (1999-2016)**

| Region                          | Country            | Percentage of children under five whose birth is not registered |          |        |                      |          | Percentage of children under five whose birth is not registered |       |          |                      |        | Interval change in percentage of children under five whose birth is not registered (% points) |             |             |             |             |             |          |        |
|---------------------------------|--------------------|-----------------------------------------------------------------|----------|--------|----------------------|----------|-----------------------------------------------------------------|-------|----------|----------------------|--------|-----------------------------------------------------------------------------------------------|-------------|-------------|-------------|-------------|-------------|----------|--------|
|                                 |                    | Wave 3 (2009-2012)                                              |          |        | Children under 5 (n) |          | Wave 4 (2013-2015)                                              |       |          | Children under 5 (n) |        | Wave 1 to 2                                                                                   | Wave 2 to 3 | Wave 3 to 4 | Wave 1 to 4 | Wave 2 to 4 | Wave 1 to 3 |          |        |
|                                 |                    | Year                                                            | Estimate | 95% CI | Year                 | Estimate | 95% CI                                                          | Year  | Estimate | 95% CI               | Year   | Estimate                                                                                      | 95% CI      | Year        | Estimate    | 95% CI      | Year        | Estimate | 95% CI |
| East Asia & Pacific             | Thailand           | 2012                                                            | 0.48     | 0.31   | 0.76                 | 9716     |                                                                 |       |          |                      |        |                                                                                               |             |             |             |             |             |          |        |
|                                 | Mongolia           | 2010                                                            | 1.03     | 0.72   | 1.48                 | 3956     | 2013                                                            | 0.70  | 0.52     | 0.95                 | 6054   | -0.70905                                                                                      | -0.64       | -0.33       | -1.68       | -0.97       | -1.35       |          |        |
|                                 | Vietnam            | 2010                                                            | 5.03     | 3.88   | 6.50                 | 3678     | 2013                                                            | 3.94  | 3.16     | 4.89                 | 3316   | -15.5007                                                                                      | -7.23       | -1.09       | -23.82      | -8.32       | -22.73      |          |        |
|                                 | Cambodia           | 2010                                                            | 37.94    | 35.97  | 39.95                | 8123     | 2014                                                            | 26.69 | 24.67    | 28.81                | 7806   |                                                                                               | 4.34        | -11.26      |             | -6.92       |             |          |        |
|                                 | Myanmar            |                                                                 |          |        |                      |          | 2015                                                            | 18.71 | 16.22    | 21.49                | 4634   |                                                                                               |             |             | -20.64      |             |             |          |        |
|                                 | Lao                | 2011                                                            | 25.24    | 23.62  | 26.92                | 11067    |                                                                 |       |          |                      |        | -12.0869                                                                                      | -3.29       |             |             |             |             |          | -15.38 |
|                                 | Indonesia          | 2012                                                            | 33.36    | 31.87  | 34.88                | 16785    |                                                                 |       |          |                      |        |                                                                                               | -16.00      |             |             |             |             |          |        |
| Europe & Central Asia           | Ukraine            | 2012                                                            | 0.21     | 0.05   | 0.85                 | 4379     |                                                                 |       |          |                      |        |                                                                                               | 0.01        |             |             |             |             |          |        |
|                                 | Uzbekistan         |                                                                 |          |        |                      |          |                                                                 |       |          |                      |        |                                                                                               | -0.38549    |             |             |             |             |          |        |
|                                 | Kazakhstan         | 2010                                                            | 0.26     | 0.15   | 0.43                 | 5181     | 2015                                                            | 0.33  | 0.19     | 0.57                 | 5172   |                                                                                               | -0.52       | 0.07        |             | -0.45       |             |          |        |
|                                 | Serbia             | 2010                                                            | 1.08     | 0.45   | 2.55                 | 3374     | 2014                                                            | 0.58  | 0.28     | 1.19                 | 2720   |                                                                                               | 0.04        | -0.50       |             | -0.46       |             |          |        |
|                                 | Albania            |                                                                 |          |        |                      |          |                                                                 |       |          |                      |        | 0.18                                                                                          |             |             |             |             |             |          |        |
|                                 | Montenegro         |                                                                 |          |        |                      |          | 2013                                                            | 0.59  | 0.26     | 1.36                 | 1420   |                                                                                               |             |             |             | -1.46       |             |          |        |
|                                 | Moldova            | 2012                                                            | 0.43     | 0.21   | 0.89                 | 1869     |                                                                 |       |          |                      |        | 5.53                                                                                          | -7.23       |             |             |             |             |          | -1.71  |
|                                 | Azerbaijan         |                                                                 |          |        |                      |          |                                                                 |       |          |                      |        | 3.18                                                                                          |             |             |             |             |             |          |        |
|                                 | Armenia            | 2010                                                            | 0.41     | 0.17   | 1.04                 | 1480     |                                                                 |       |          |                      |        |                                                                                               | -3.20       |             |             |             |             |          |        |
|                                 | Turkmenistan       |                                                                 |          |        |                      |          | 2015                                                            | 0.42  | 0.24     | 0.73                 | 3280   |                                                                                               |             |             |             |             |             |          | -4.10  |
|                                 | Kyrgyzstan         | 2012                                                            | 1.67     | 1.22   | 2.27                 | 4440     | 2014                                                            | 2.27  | 1.51     | 3.40                 | 4577   |                                                                                               | -4.00       | 0.60        |             | -3.40       |             |          |        |
| Macedonia                       | 2011               | 0.26                                                            | 0.10     | 0.67   | 1376                 |          |                                                                 |       |          |                      |        | -5.93                                                                                         |             |             |             |             |             |          |        |
| Tajikistan                      | 2012               | 11.58                                                           | 10.28    | 13.02  | 5537                 |          |                                                                 |       |          |                      |        | -13.70                                                                                        | -0.15       |             |             |             |             | -13.85   |        |
| Latin America and the Caribbean | Suriname           | 2010                                                            | 1.10     | 0.73   | 1.68                 | 3308     |                                                                 |       |          |                      |        |                                                                                               | -2.29       |             |             |             |             |          |        |
|                                 | Guyana             | 2009                                                            | 12.08    | 9.96   | 14.58                | 2053     | 2014                                                            | 11.26 | 9.75     | 12.96                | 3358   | 3.27                                                                                          | 5.33        | -0.82       | 7.77        | 4.51        | 8.60        |          |        |
|                                 | Belize             | 2011                                                            | 4.76     | 3.81   | 5.93                 | 1946     |                                                                 |       |          |                      |        |                                                                                               | -0.86       |             |             |             |             |          |        |
|                                 | Honduras           | 2011                                                            | 6.45     | 5.87   | 7.08                 | 10736    |                                                                 |       |          |                      |        |                                                                                               | -0.01       |             |             |             |             |          |        |
|                                 | Bolivia            |                                                                 |          |        |                      |          |                                                                 |       |          |                      |        | 5.64                                                                                          |             |             |             |             |             |          |        |
|                                 | Haiti              | 2012                                                            | 20.25    | 18.57  | 22.04                | 7103     |                                                                 |       |          |                      |        |                                                                                               | 1.33        |             |             |             |             |          |        |
| Middle East & North Africa      | Dominican Rep      |                                                                 |          |        |                      |          | 2014                                                            | 11.97 | 11.14    | 12.85                | 19981  | -3.19                                                                                         |             |             | -13.44      | -10.25      |             |          |        |
|                                 | State of Palestine | 2010                                                            | 0.69     | 0.54   | 0.88                 | 11106    | 2014                                                            | 0.66  | 0.48     | 0.92                 | 7816   |                                                                                               |             | -0.03       |             |             |             |          |        |
|                                 | Iraq               | 2011                                                            | 0.77     | 0.63   | 0.93                 | 36307    |                                                                 |       |          |                      |        |                                                                                               |             |             |             |             |             |          | -1.11  |
|                                 | Yemen              |                                                                 |          |        |                      |          | 2013                                                            | 69.30 | 67.52    | 71.03                | 15600  |                                                                                               |             |             |             |             |             |          | -8.45  |
| South Asia                      | India              |                                                                 |          |        |                      |          | 2015                                                            | 20.27 | 19.89    | 20.65                | 243867 |                                                                                               |             |             |             |             |             |          | -38.58 |
|                                 | Afghanistan        | 2010                                                            | 62.66    | 59.34  | 65.86                | 13938    | 2015                                                            | 57.70 | 54.55    | 60.78                | 31401  |                                                                                               |             | -4.96       |             |             |             |          |        |
|                                 | Nepal              | 2011                                                            | 57.74    | 54.80  | 60.63                | 5270     | 2016                                                            | 43.79 | 41.32    | 46.30                | 4841   |                                                                                               | -7.29       | -13.95      |             | -21.24      |             |          |        |
|                                 | Pakistan           | 2012                                                            | 66.39    | 62.81  | 69.78                | 11678    |                                                                 |       |          |                      |        |                                                                                               | -7.03       |             |             |             |             |          |        |
|                                 | Bangladesh         | 2012                                                            | 63.02    | 61.82  | 64.21                | 20903    | 2014                                                            | 79.84 | 78.16    | 81.43                | 7799   |                                                                                               | -27.13      | 16.82       |             | -10.31      |             |          |        |

**Table S2: Change in the percentage of children under five whose birth is not registered in 67 countries (1999-2016)**

| Region             | Country           | Change in % of children under five whose birth is not registered between first and most recent survey |          |                    |          |           |              |               | Percentage of children under five whose birth is not registered |          |        |                      |         | Percentage of children under five whose birth is not registered |        |                      |       |       |
|--------------------|-------------------|-------------------------------------------------------------------------------------------------------|----------|--------------------|----------|-----------|--------------|---------------|-----------------------------------------------------------------|----------|--------|----------------------|---------|-----------------------------------------------------------------|--------|----------------------|-------|-------|
|                    |                   | First survey                                                                                          |          | Most recent survey |          | Change    |              |               | Wave 1 (1999-2004)                                              |          |        |                      |         | Wave 2 (2004-2008)                                              |        |                      |       |       |
|                    |                   | Year                                                                                                  | Estimate | Year               | Estimate | Years (n) | Total change | Annual change | Year                                                            | Estimate | 95% CI | Children under 5 (n) | Year    | Estimate                                                        | 95% CI | Children under 5 (n) |       |       |
|                    | Ghana             | 2006                                                                                                  | 48.53    | 2014               | 29.30    | 8         | -19.23       | -2.40         |                                                                 |          |        |                      |         |                                                                 |        |                      |       |       |
|                    | Comoros           | 2000                                                                                                  | 16.58    | 2012               | 12.70    | 12        | -3.88        | -0.32         | 2000                                                            | 16.58    | 14.24  | 19.21                | 4870    |                                                                 |        |                      |       |       |
|                    | Rwanda            | 2005                                                                                                  | 17.62    | 2014               | 44.01    | 9         | 26.39        | 2.93          |                                                                 |          |        |                      |         | 2005                                                            | 17.62  | 16.23                | 19.11 | 8123  |
|                    | Togo              | 2000                                                                                                  | 17.91    | 2010               | 22.06    | 10        | 4.15         | 0.42          | 2000                                                            | 17.91    | 15.09  | 21.12                | 3129    | 2006                                                            | 21.94  | 19.43                | 24.68 | 4073  |
|                    | Burundi           | 2000                                                                                                  | 25.11    | 2010               | 24.84    | 10        | -0.27        | -0.03         | 2000                                                            | 25.11    | 22.60  | 27.80                | 3325    | 2005                                                            | 39.79  | 37.29                | 42.35 | 6894  |
|                    | Zimbabwe          | 2005                                                                                                  | 26.06    | 2015               | 56.54    | 10        | 30.49        | 3.05          |                                                                 |          |        |                      |         | 2005                                                            | 26.06  | 24.11                | 28.10 | 5809  |
|                    | CAR               | 2000                                                                                                  | 27.46    | 2010               | 38.97    | 10        | 11.51        | 1.15          | 2000                                                            | 27.46    | 24.95  | 30.13                | 14258   | 2006                                                            | 50.70  | 46.90                | 54.50 | 9454  |
|                    | Cote d'Ivoire     | 2000                                                                                                  | 28.16    | 2011               | 35.04    | 11        | 6.89         | 0.63          | 2000                                                            | 28.16    | 25.45  | 31.04                | 7987    | 2006                                                            | 45.06  | 40.81                | 49.40 | 8604  |
|                    | S Tome & Principe | 2000                                                                                                  | 30.12    | 2014               | 4.79     | 14        | -25.33       | -1.81         | 2000                                                            | 30.12    | 27.14  | 33.28                | 2121    | 2008                                                            | 24.94  | 21.68                | 28.50 | 2101  |
|                    | Namibia           | 2006                                                                                                  | 32.90    | 2013               | 12.87    | 7         | -20.03       | -2.86         |                                                                 |          |        |                      |         | 2006                                                            | 32.90  | 30.79                | 35.09 | 5461  |
|                    | Senegal           | 2000                                                                                                  | 34.03    | 2015               | 31.74    | 15        | -2.30        | -0.15         | 2000                                                            | 34.03    | 30.26  | 38.02                | 1316274 |                                                                 |        |                      |       |       |
|                    | Burkina Faso      | 2006                                                                                                  | 36.34    | 2010               | 23.12    | 4         | -13.22       | -3.31         |                                                                 |          |        |                      |         | 2006                                                            | 36.34  | 31.94                | 40.99 | 5283  |
|                    | Kenya             | 2008                                                                                                  | 39.99    | 2014               | 33.12    | 6         | -6.88        | -1.15         |                                                                 |          |        |                      |         | 2008                                                            | 39.99  | 36.35                | 43.75 | 5956  |
|                    | Mauritania        | 2007                                                                                                  | 44.17    | 2011               | 41.16    | 4         | -3.01        | -0.75         |                                                                 |          |        |                      |         | 2007                                                            | 44.17  | 41.06                | 47.32 | 8658  |
|                    | Mali              | 2006                                                                                                  | 46.73    | 2012               | 15.71    | 6         | -31.02       | -5.17         |                                                                 |          |        |                      |         | 2006                                                            | 46.73  | 44.00                | 49.47 | 13837 |
| Sub-Saharan Africa | Benin             | 2006                                                                                                  | 46.93    | 2011               | 19.82    | 5         | -27.11       | -5.42         |                                                                 |          |        |                      |         | 2006                                                            | 46.93  | 44.80                | 49.07 | 16098 |
|                    | Swaziland         | 2000                                                                                                  | 47.05    | 2014               | 46.51    | 14        | -0.55        | -0.04         | 2000                                                            | 47.05    | 43.35  | 50.79                | 3416    | 2006                                                            | 70.17  | 67.69                | 72.55 | 3219  |
|                    | Sierra Leone      | 2000                                                                                                  | 53.56    | 2013               | 23.29    | 13        | -30.27       | -2.33         | 2000                                                            | 53.56    | 49.27  | 57.80                | 2710    | 2008                                                            | 49.15  | 46.10                | 52.20 | 6709  |
|                    | Niger             | 2000                                                                                                  | 54.49    | 2012               | 36.12    | 12        | -18.37       | -1.53         | 2000                                                            | 54.49    | 49.38  | 59.52                | 5060    | 2006                                                            | 68.22  | 65.00                | 71.28 | 9293  |
|                    | Lesotho           | 2009                                                                                                  | 54.86    | 2014               | 56.65    | 5         | 1.79         | 0.36          |                                                                 |          |        |                      |         |                                                                 |        |                      |       |       |
|                    | Guinea Bissau     | 2000                                                                                                  | 57.87    | 2014               | 76.34    | 14        | 18.47        | 1.32          | 2000                                                            | 57.87    | 54.02  | 61.63                | 5856    | 2006                                                            | 61.11  | 58.30                | 63.85 | 5846  |
|                    | Congo DR          | 2001                                                                                                  | 65.83    | 2013               | 75.39    | 12        | 9.55         | 0.80          | 2001                                                            | 65.83    | 62.43  | 69.09                | 8864    | 2007                                                            | 68.72  | 64.51                | 72.64 | 8918  |
|                    | Cameroon          | 2000                                                                                                  | 66.08    | 2014               | 33.93    | 14        | -32.15       | -2.30         | 2000                                                            | 66.08    | 62.95  | 69.08                | 3398    | 2006                                                            | 29.90  | 27.02                | 32.94 | 6362  |
|                    | Gambia            | 2000                                                                                                  | 67.78    | 2013               | 28.02    | 13        | -39.76       | -3.06         | 2000                                                            | 67.78    | 62.84  | 72.36                | 3583    | 2005                                                            | 44.95  | 42.05                | 47.88 | 6543  |
|                    | Mozambique        | 2008                                                                                                  | 69.16    | 2011               | 52.12    | 3         | -17.03       | -5.68         |                                                                 |          |        |                      |         | 2008                                                            | 69.16  | 66.35                | 71.83 | 11419 |
|                    | Angola            | 2001                                                                                                  | 70.78    | 2015               | 74.97    | 14        | 4.19         | 0.30          | 2001                                                            | 70.78    | 68.72  | 72.76                | 5282    |                                                                 |        |                      |       |       |
|                    | Chad              | 2000                                                                                                  | 75.06    | 2014               | 87.96    | 14        | 12.90        | 0.92          | 2000                                                            | 75.06    | 70.58  | 79.06                | 5384    |                                                                 |        |                      |       |       |
|                    | Nigeria           | 2007                                                                                                  | 76.69    | 2013               | 70.16    | 6         | -6.54        | -1.09         |                                                                 |          |        |                      |         | 2007                                                            | 76.69  | 74.35                | 78.89 | 15511 |
|                    | Uganda            | 2006                                                                                                  | 78.98    | 2011               | 70.12    | 5         | -8.86        | -1.77         |                                                                 |          |        |                      |         | 2006                                                            | 78.98  | 76.58                | 81.20 | 8399  |
|                    | Tanzania          | 2010                                                                                                  | 83.75    | 2015               | 73.61    | 5         | -10.14       | -2.03         |                                                                 |          |        |                      |         |                                                                 |        |                      |       |       |
|                    | Zambia            | 1999                                                                                                  | 90.43    | 2013               | 88.71    | 14        | -1.72        | -0.12         | 1999                                                            | 90.43    | 88.23  | 92.25                | 1563275 | 2007                                                            | 85.99  | 83.85                | 87.88 | 6341  |
|                    | Liberia           | 2007                                                                                                  | 96.43    | 2013               | 75.38    | 6         | -21.04       | -3.51         |                                                                 |          |        |                      |         | 2007                                                            | 96.43  | 95.38                | 97.24 | 6028  |



**Table S2: Change in the percentage of children under five whose birth is not registered in 67 countries (1999-2016)**

| Region             | Country           | Percentage of children under five whose birth is not registered |          |        |                      | Percentage of children under five whose birth is not registered |          |        |                      | Interval change in percentage of children under five whose birth is not registered (% points) |             |             |             |             |             |        |        |        |        |
|--------------------|-------------------|-----------------------------------------------------------------|----------|--------|----------------------|-----------------------------------------------------------------|----------|--------|----------------------|-----------------------------------------------------------------------------------------------|-------------|-------------|-------------|-------------|-------------|--------|--------|--------|--------|
|                    |                   | Wave 3 (2009-2012)                                              |          |        |                      | Wave 4 (2013-2015)                                              |          |        |                      |                                                                                               |             |             |             |             |             |        |        |        |        |
|                    |                   | Year                                                            | Estimate | 95% CI | Children under 5 (n) | Year                                                            | Estimate | 95% CI | Children under 5 (n) | Wave 1 to 2                                                                                   | Wave 2 to 3 | Wave 3 to 4 | Wave 1 to 4 | Wave 2 to 4 | Wave 1 to 3 |        |        |        |        |
| Sub-Saharan Africa | Ghana             | 2011                                                            | 37.51    | 35.25  | 39.83                | 7550                                                            | 2014     | 29.30  | 26.6099              | 32.15                                                                                         | 5496        |             | -11.0205    | -8.21       |             | -19.23 |        |        |        |
|                    | Comoros           | 2012                                                            | 12.70    | 10.87  | 14.78                | 3392                                                            |          |        |                      |                                                                                               |             |             |             |             |             |        |        | -3.88  |        |
|                    | Rwanda            | 2010                                                            | 36.76    | 34.86  | 38.69                | 8971                                                            | 2014     | 44.01  | 41.82                | 46.22                                                                                         | 7915        |             | 19.14       | 7.25        |             | 26.39  |        |        |        |
|                    | Togo              | 2010                                                            | 22.06    | 19.77  | 24.54                | 4746                                                            |          |        |                      |                                                                                               |             | 4.04        | 0.12        |             |             |        |        | 4.15   |        |
|                    | Burundi           | 2010                                                            | 24.84    | 22.45  | 27.40                | 7600                                                            |          |        |                      |                                                                                               |             | 14.68       | -14.95      |             |             |        |        | -0.27  |        |
|                    | Zimbabwe          | 2010                                                            | 51.22    | 49.00  | 53.43                | 5913                                                            | 2015     | 56.54  | 54.33                | 58.73                                                                                         | 6615        |             | 25.16       | 5.33        |             | 30.49  |        |        |        |
|                    | CAR               | 2010                                                            | 38.97    | 36.56  | 41.43                | 10474                                                           |          |        |                      |                                                                                               |             | 23.24       | -11.73      |             |             |        |        | 11.51  |        |
|                    | Cote d'Ivoire     | 2011                                                            | 35.04    | 32.27  | 37.92                | 7773                                                            |          |        |                      |                                                                                               |             | 16.91       | -10.02      |             |             |        |        | 6.89   |        |
|                    | S Tome & Principe |                                                                 |          |        |                      |                                                                 | 2014     | 4.79   | 3.62                 | 6.32                                                                                          | 2030        |             | -5.18       |             |             | -25.33 | -20.15 |        |        |
|                    | Namibia           |                                                                 |          |        |                      |                                                                 | 2013     | 12.87  | 11.43                | 14.47                                                                                         | 5678        |             |             |             |             |        |        |        | -20.03 |
|                    | Senegal           | 2010                                                            | 25.42    | 23.33  | 27.62                | 12227                                                           | 2015     | 31.74  | 28.69                | 34.96                                                                                         | 6280        |             |             | 6.32        | -2.30       |        |        |        | -8.62  |
|                    | Burkina Faso      | 2010                                                            | 23.12    | 21.44  | 24.89                | 14704                                                           |          |        |                      |                                                                                               |             |             |             | -13.22      |             |        |        |        |        |
|                    | Kenya             |                                                                 |          |        |                      |                                                                 | 2014     | 33.12  | 31.63                | 34.64                                                                                         | 19954       |             |             |             |             |        |        |        | -6.88  |
|                    | Mauritania        | 2011                                                            | 41.16    | 39.00  | 43.35                | 9278                                                            |          |        |                      |                                                                                               |             |             |             | -3.01       |             |        |        |        |        |
|                    | Mali              | 2012                                                            | 15.71    | 13.79  | 17.84                | 10749                                                           |          |        |                      |                                                                                               |             |             |             |             | -31.02      |        |        |        |        |
|                    | Benin             | 2011                                                            | 19.82    | 18.34  | 21.39                | 14162                                                           |          |        |                      |                                                                                               |             |             |             |             | -27.11      |        |        |        |        |
|                    | Swaziland         | 2010                                                            | 50.54    | 48.08  | 53.00                | 2647                                                            | 2014     | 46.51  | 43.64                | 49.40                                                                                         | 2693        | 23.12       | -19.63      | -4.04       | -0.55       | -23.67 | 3.49   |        |        |
|                    | Sierra Leone      | 2010                                                            | 22.01    | 19.83  | 24.35                | 8583                                                            | 2013     | 23.29  | 20.71                | 26.08                                                                                         | 12282       | -4.41       | -27.14      | 1.28        | -30.27      | -25.86 | -31.55 |        |        |
|                    | Niger             | 2012                                                            | 36.12    | 33.46  | 38.87                | 13584                                                           |          |        |                      |                                                                                               |             |             | 13.73       | -32.10      |             |        |        |        | -18.37 |
|                    | Lesotho           | 2009                                                            | 54.86    | 52.50  | 57.20                | 4174                                                            | 2014     | 56.65  | 54.02                | 59.25                                                                                         | 3719        |             |             | 1.79        |             |        |        |        |        |
|                    | Guinea Bissau     |                                                                 |          |        |                      |                                                                 | 2014     | 76.34  | 74.25                | 78.31                                                                                         | 7573        | 3.24        |             |             |             | 18.47  | 15.23  |        |        |
|                    | Congo DR          | 2010                                                            | 72.23    | 68.80  | 75.42                | 11093                                                           | 2013     | 75.39  | 72.33                | 78.21                                                                                         | 18937       | 2.89        | 3.51        | 3.16        | 9.55        | 6.67   | 6.40   |        |        |
|                    | Cameroon          | 2011                                                            | 38.56    | 36.21  | 40.96                | 11802                                                           | 2014     | 33.93  | 31.35                | 36.61                                                                                         | 7081        | -36.18      | 8.66        | -4.63       | -32.15      | 4.03   | -27.52 |        |        |
|                    | Gambia            |                                                                 |          |        |                      |                                                                 | 2013     | 28.02  | 25.52                | 30.66                                                                                         | 8766        | -22.83      |             |             | -39.76      | -16.93 |        |        |        |
| Mozambique         | 2011              | 52.12                                                           | 50.06    | 54.18  | 10718                |                                                                 |          |        |                      |                                                                                               |             |             | -17.03      |             |             |        |        |        |        |
| Angola             |                   |                                                                 |          |        |                      | 2015                                                            | 74.97    | 73.25  | 76.62                | 15189                                                                                         |             |             |             |             | 4.19        |        |        |        |        |
| Chad               | 2010              | 84.36                                                           | 82.94    | 85.68  | 17006                | 2014                                                            | 87.96    | 86.73  | 89.09                | 18933                                                                                         |             |             | 3.60        | 12.90       |             | 9.30   |        |        |        |
| Nigeria            | 2011              | 58.50                                                           | 56.48    | 60.49  | 25192                | 2013                                                            | 70.16    | 68.25  | 71.99                | 30109                                                                                         |             | -18.20      | 11.66       |             | -6.54       |        |        |        |        |
| Uganda             | 2011              | 70.12                                                           | 67.57    | 72.56  | 8361                 |                                                                 |          |        |                      |                                                                                               |             |             | -8.86       |             |             |        |        |        |        |
| Tanzania           | 2010              | 83.75                                                           | 82.26    | 85.14  | 8081                 | 2015                                                            | 73.61    | 71.88  | 75.27                | 10091                                                                                         |             |             |             | -10.14      |             |        |        |        |        |
| Zambia             |                   |                                                                 |          |        |                      | 2013                                                            | 88.71    | 87.35  | 89.93                | 13716                                                                                         | -4.44       |             |             |             | -1.72       | 2.72   |        |        |        |
| Liberia            |                   |                                                                 |          |        |                      | 2013                                                            | 75.38    | 72.70  | 77.88                | 7344                                                                                          |             |             |             |             |             |        |        | -21.04 |        |

Notes: Estimates presented should be consistent with published DHS and MICS reports. Estimates in the following surveys are different from the reports: Benin (DHS, 2006), Indonesia (DHS 2007), Mongolia (MICS 2000), Senegal (DHS, 2015). Sample sizes of children under five in the following surveys are different from the reports: Kazakhstan (MICS 2015), Nigeria (MICS 2007), Swaziland (MICS 2000).

**Table S3: Change in wealth inequalities in the percentage of children under five whose birth is not registered in 67 countries (1999-2016)**





**Table S3: Change in wealth inequities in the percentage of children under five whose birth is not registered in 67 countries (1999-2016)**

| Region             | Country           | Total change in SII between first and most recent survey |          |                    |          |           |              |               | % of children under five whose birth is not registered by wealth quintile and SII |             |       |          |        | % of children under five whose birth is not registered by wealth quintile and SII |       |             |          |        |       |       |
|--------------------|-------------------|----------------------------------------------------------|----------|--------------------|----------|-----------|--------------|---------------|-----------------------------------------------------------------------------------|-------------|-------|----------|--------|-----------------------------------------------------------------------------------|-------|-------------|----------|--------|-------|-------|
|                    |                   | First survey                                             |          | Most recent survey |          | Change    |              |               | Wave 1 (1999-2004)                                                                |             |       |          |        | Wave 2 (2004-2008)                                                                |       |             |          |        |       |       |
|                    |                   | Year                                                     | Estimate | Year               | Estimate | Years (n) | Total change | Annual change | Year                                                                              | Average (%) |       | SII      |        |                                                                                   | Year  | Average (%) |          | SII    |       |       |
|                    |                   |                                                          |          |                    |          |           |              |               |                                                                                   | Q1&2        | Q3-5  | Estimate | 95% CI | Q1&2                                                                              |       | Q3-5        | Estimate | 95% CI |       |       |
|                    | Angola            | 2001                                                     | 35.31    | 2015               | 44.82    | 14        | 9.51         | 0.68          | 2001                                                                              | 80.89       | 65.27 | 35.31    | 29.80  | 40.82                                                                             |       |             |          |        |       |       |
|                    | Benin             | 2006                                                     | 48.44    | 2011               | 42.13    | 5         | -6.31        | -1.26         |                                                                                   |             |       |          |        |                                                                                   | 2006  | 60.50       | 36.67    | 48.44  | 43.87 | 53.00 |
|                    | Burkina Faso      | 2006                                                     | 42.32    | 2010               | 38.85    | 4         | -3.47        | -0.87         |                                                                                   |             |       |          |        |                                                                                   | 2006  | 47.74       | 28.14    | 42.32  | 32.90 | 51.75 |
|                    | Burundi           | 2000                                                     | 9.32     | 2010               | 25.30    | 10        | 15.98        | 1.60          | 2000                                                                              | 29.24       | 22.72 | 9.32     | 2.45   | 16.18                                                                             | 2005  | 41.63       | 38.51    | 7.25   | 0.87  | 13.64 |
|                    | CAR               | 2000                                                     | 47.01    | 2010               | 45.66    | 10        | -1.35        | -0.13         | 2000                                                                              | 42.26       | 16.71 | 47.01    | 42.28  | 51.73                                                                             | 2006  | 70.73       | 36.08    | 66.16  | 61.41 | 70.90 |
|                    | Cameroon          | 2000                                                     | 6.85     | 2014               | 64.27    | 14        | 57.42        | 4.10          | 2000                                                                              | 69.43       | 63.49 | 6.85     | -3.05  | 16.75                                                                             | 2006  | 44.58       | 17.55    | 50.08  | 43.03 | 57.12 |
|                    | Chad              | 2000                                                     | 35.25    | 2014               | 30.26    | 14        | -4.99        | -0.36         | 2000                                                                              | 83.11       | 68.61 | 35.25    | 25.08  | 45.42                                                                             |       |             |          |        |       |       |
|                    | Comoros           | 2000                                                     | 23.21    | 2012               | 9.62     | 12        | -13.60       | -1.13         | 2000                                                                              | 22.79       | 12.38 | 23.21    | 16.25  | 30.18                                                                             |       |             |          |        |       |       |
|                    | Congo DR          | 2001                                                     | 6.54     | 2013               | 22.22    | 12        | 15.68        | 1.31          | 2001                                                                              | 64.11       | 66.94 | 6.54     | -2.68  | 15.77                                                                             | 2007  | 70.23       | 67.60    | 5.92   | -3.75 | 15.59 |
|                    | Cote d'Ivoire     | 2000                                                     | 47.16    | 2011               | 51.76    | 11        | 4.60         | 0.42          | 2000                                                                              | 40.68       | 17.00 | 47.16    | 41.61  | 52.71                                                                             | 2006  | 65.27       | 27.58    | 69.45  | 63.98 | 74.91 |
|                    | Gambia            | 2000                                                     | 12.66    | 2013               | 4.06     | 13        | -8.60        | -0.66         | 2000                                                                              | 68.94       | 67.03 | 12.66    | 1.21   | 24.10                                                                             | 2005  | 44.82       | 45.05    | 7.12   | -0.60 | 14.84 |
|                    | Ghana             | 2006                                                     | 57.16    | 2014               | 38.10    | 8         | -19.06       | -2.38         |                                                                                   |             |       |          |        |                                                                                   | 2006  | 64.89       | 34.30    | 57.16  | 50.40 | 63.91 |
|                    | Guinea Bissau     | 2000                                                     | 39.33    | 2014               | 33.43    | 14        | -5.90        | -0.42         | 2000                                                                              | 44.43       | 67.64 | 39.33    | 33.07  | 45.59                                                                             | 2006  | 73.34       | 51.34    | 43.23  | 37.42 | 49.04 |
|                    | Kenya             | 2008                                                     | 35.36    | 2014               | 43.02    | 6         | 7.66         | 1.28          |                                                                                   |             |       |          |        |                                                                                   | 2008  | 49.32       | 32.06    | 35.36  | 24.16 | 46.56 |
|                    | Lesotho           | 2009                                                     | 9.66     | 2014               | 30.36    | 5         | 20.70        | 4.14          |                                                                                   |             |       |          |        |                                                                                   |       |             |          |        |       |       |
| Sub-Saharan Africa | Liberia           | 2007                                                     | 6.57     | 2013               | 17.54    | 6         | 10.97        | 1.83          |                                                                                   |             |       |          |        |                                                                                   | 2007  | 98.18       | 94.88    | 6.57   | 3.34  | 9.80  |
|                    | Mali              | 2006                                                     | 41.25    | 2012               | 29.64    | 6         | -11.61       | -1.93         |                                                                                   |             |       |          |        |                                                                                   | 2006  | 56.67       | 39.97    | 41.25  | 33.56 | 48.94 |
|                    | Mauritania        | 2007                                                     | 68.46    | 2011               | 61.91    | 4         | -6.55        | -1.64         |                                                                                   |             |       |          |        |                                                                                   | 2007  | 65.65       | 26.65    | 68.46  | 63.85 | 73.07 |
|                    | Mozambique        | 2008                                                     | 32.59    | 2011               | 18.94    | 3         | -13.65       | -4.55         |                                                                                   |             |       |          |        |                                                                                   | 2008  | 78.44       | 61.67    | 32.59  | 26.14 | 39.04 |
|                    | Namibia           | 2006                                                     | 50.95    | 2013               | 12.27    | 7         | -38.68       | -5.53         |                                                                                   |             |       |          |        |                                                                                   | 2006  | 46.39       | 21.37    | 50.95  | 45.41 | 56.49 |
|                    | Niger             | 2000                                                     | 45.58    | 2012               | 37.09    | 12        | -8.49        | -0.71         | 2000                                                                              | 65.59       | 47.50 | 45.58    | 37.01  | 54.15                                                                             | 2006  | 79.63       | 60.03    | 47.22  | 40.00 | 54.44 |
|                    | Nigeria           | 2007                                                     | 52.24    | 2013               | 65.38    | 6         | 13.14        | 2.19          |                                                                                   |             |       |          |        |                                                                                   | 2007  | 90.85       | 67.31    | 52.24  | 45.70 | 58.79 |
|                    | Rwanda            | 2005                                                     | 2.42     | 2014               | 28.41    | 9         | 25.99        | 2.89          |                                                                                   |             |       |          |        |                                                                                   | 2005  | 17.08       | 18.00    | 2.42   | -1.63 | 6.47  |
|                    | S Tome & Principe | 2000                                                     | 29.34    | 2014               | 16.22    | 14        | -13.12       | -0.94         | 2000                                                                              | 37.69       | 24.57 | 29.34    | 21.77  | 36.91                                                                             | 2008  | 27.12       | 23.48    | 10.85  | 1.23  | 20.46 |
|                    | Senegal           | 2000                                                     | 57.67    | 2015               | 57.78    | 15        | 0.11         | 0.01          | 2000                                                                              | 52.36       | 20.77 | 57.67    | 51.27  | 64.07                                                                             |       |             |          |        |       |       |
|                    | Sierra Leone      | 2000                                                     | 52.47    | 2013               | 4.71     | 13        | -47.76       | -3.67         | 2000                                                                              | 68.64       | 42.02 | 52.47    | 44.35  | 60.58                                                                             | 2008  | 55.19       | 44.45    | 21.87  | 13.91 | 29.82 |
|                    | Swaziland         | 2000                                                     | 29.31    | 2014               | 41.15    | 14        | 11.84        | 0.85          | 2000                                                                              | 54.17       | 39.51 | 29.31    | 19.94  | 38.69                                                                             | 2006  | 78.76       | 62.68    | 33.27  | 26.02 | 40.52 |
|                    | Tanzania          | 2010                                                     | 47.00    | 2015               | 58.20    | 5         | 11.20        | 2.24          |                                                                                   |             |       |          |        |                                                                                   |       |             |          |        |       |       |
|                    | Togo              | 2000                                                     | 25.75    | 2010               | 49.76    | 10        | 24.01        | 2.40          | 2000                                                                              | 23.88       | 12.88 | 25.75    | 17.75  | 33.75                                                                             | 2006  | 36.72       | 10.90    | 49.73  | 43.08 | 56.38 |
|                    | Uganda            | 2006                                                     | 6.92     | 2011               | 16.12    | 5         | 9.20         | 1.84          |                                                                                   |             |       |          |        |                                                                                   | 2006  | 79.77       | 78.34    | 6.92   | 1.08  | 12.76 |
|                    | Zambia            | 1999                                                     | 17.19    | 2013               | 25.85    | 14        | 8.66         | 0.62          | 1999                                                                              | 93.76       | 88.14 | 17.19    | 10.54  | 23.84                                                                             | 2007  | 93.14       | 79.77    | 28.85  | 21.33 | 36.38 |
| Zimbabwe           | 2005              | 20.54                                                    | 2015     | 58.47              | 10       | 37.94     | 3.79         |               |                                                                                   |             |       |          |        | 2005                                                                              | 31.17 | 21.66       | 20.54    | 14.19  | 26.88 |       |



**Table S4: Change in urban/rural inequalities in the percentage of children under five whose birth is not registered in 67 countries (1999-2016)**

Table S4: Change in urban/rural inequities in the percentage of children under five whose birth is not registered in 67 countries (1999-2016)

| Region                          | Country            | Total change in urban/rural difference between first and most recent survey |          |                    |          |           |              |               | % of children under five whose birth is not registered by urban/rural residence and urban/rural difference |             |       |                       |        | % of children under five whose birth is not registered by urban/rural residence and urban/rural difference |      |             |       |                       |        |       |
|---------------------------------|--------------------|-----------------------------------------------------------------------------|----------|--------------------|----------|-----------|--------------|---------------|------------------------------------------------------------------------------------------------------------|-------------|-------|-----------------------|--------|------------------------------------------------------------------------------------------------------------|------|-------------|-------|-----------------------|--------|-------|
|                                 |                    | First survey                                                                |          | Most recent survey |          | Change    |              |               | Wave 1 (1999-2004)                                                                                         |             |       |                       |        | Wave 2 (2004-2008)                                                                                         |      |             |       |                       |        |       |
|                                 |                    | Year                                                                        | Estimate | Year               | Estimate | Years (n) | Total change | Annual change | Year                                                                                                       | Average (%) |       | Difference (% points) |        |                                                                                                            | Year | Average (%) |       | Difference (% points) |        |       |
|                                 |                    |                                                                             |          |                    |          |           |              |               |                                                                                                            | Rural       | Urban | Estimate              | 95% CI | 95% CI                                                                                                     |      | Rural       | Urban | Estimate              | 95% CI |       |
| East Asia & Pacific             | Cambodia           | 2005                                                                        | 5.32     | 2014               | 12.81    | 9         | 7.49         | 0.83          |                                                                                                            |             |       |                       |        |                                                                                                            | 2005 | 34.34       | 29.02 | 5.32                  | -0.93  | 11.57 |
|                                 | Indonesia          | 2007                                                                        | 26.29    | 2012               | 17.98    | 5         | -8.30        | -1.66         |                                                                                                            |             |       |                       |        |                                                                                                            | 2007 | 60.20       | 33.91 | 26.29                 | 22.73  | 29.85 |
|                                 | Lao                | 2000                                                                        | 15.41    | 2011               | 16.48    | 11        | 1.07         | 0.10          | 2000                                                                                                       | 44.27       | 28.86 | 15.41                 | 7.82   | 23.00                                                                                                      | 2006 | 31.04       | 16.07 | 14.97                 | 9.93   | 20.01 |
|                                 | Mongolia           | 2000                                                                        | 0.65     | 2013               | 0.33     | 13        | -0.32        | -0.02         | 2000                                                                                                       | 2.66        | 2.01  | 0.65                  | -0.26  | 1.55                                                                                                       | 2005 | 1.35        | 1.96  | -0.61                 | -1.52  | 0.30  |
|                                 | Myanmar            | 2000                                                                        | 33.82    | 2015               | 16.20    | 15        | -17.63       | -1.18         | 2000                                                                                                       | 46.66       | 12.84 | 33.82                 | 28.79  | 38.85                                                                                                      |      |             |       |                       |        |       |
|                                 | Thailand           | 2005                                                                        | 0.28     | 2012               | -0.60    | 7         | -0.88        | -0.13         |                                                                                                            |             |       |                       |        |                                                                                                            | 2005 | 0.70        | 0.42  | 0.28                  | -0.19  | 0.74  |
|                                 | Vietnam            | 2000                                                                        | 23.68    | 2013               | 0.98     | 13        | -22.71       | -1.75         | 2000                                                                                                       | 32.22       | 8.53  | 23.68                 | 17.38  | 29.99                                                                                                      | 2006 | 14.28       | 5.73  | 8.55                  | 4.55   | 12.55 |
| Europe & Central Asia           | Albania            | 2000                                                                        | -0.17    | 2008               | 0.58     | 8         | 0.76         | 0.09          | 2000                                                                                                       | 1.11        | 1.28  | -0.17                 | -1.45  | 1.11                                                                                                       | 2008 | 1.58        | 1.00  | 0.58                  | -0.70  | 1.86  |
|                                 | Armenia            | 2005                                                                        | 1.88     | 2010               |          | 5         |              |               |                                                                                                            |             |       |                       |        |                                                                                                            | 2005 | 4.76        | 2.88  | 1.88                  | -1.97  | 5.74  |
|                                 | Azerbaijan         | 2000                                                                        | 2.61     | 2006               | 3.84     | 6         | 1.23         | 0.21          | 2000                                                                                                       | 4.47        | 1.86  | 2.61                  | 0.33   | 4.90                                                                                                       | 2006 | 8.30        | 4.45  | 3.84                  | 0.34   | 7.35  |
|                                 | Kazakhstan         | 2006                                                                        | 0.03     | 2015               | 0.36     | 9         | 0.33         | 0.04          |                                                                                                            |             |       |                       |        |                                                                                                            | 2006 | 0.79        | 0.76  | 0.03                  | -0.63  | 0.68  |
|                                 | Kyrgyzstan         | 2005                                                                        | 2.79     | 2014               | 1.11     | 9         | -1.68        | -0.19         |                                                                                                            |             |       |                       |        |                                                                                                            | 2005 | 6.80        | 4.01  | 2.79                  | -1.27  | 6.85  |
|                                 | Macedonia          | 2005                                                                        | 1.66     | 2011               | 0.37     | 6         | -1.30        | -0.22         |                                                                                                            |             |       |                       |        |                                                                                                            | 2005 | 7.09        | 5.43  | 1.66                  | -3.91  | 7.24  |
|                                 | Moldova            | 2000                                                                        | 0.23     | 2012               | 0.25     | 12        | 0.02         | 0.00          | 2000                                                                                                       | 2.22        | 1.99  | 0.23                  | -1.34  | 1.80                                                                                                       | 2005 | 7.47        | 7.98  | -0.52                 | -3.59  | 2.56  |
|                                 | Montenegro         | 2005                                                                        | -0.85    | 2013               | -0.48    | 8         | 0.37         | 0.05          |                                                                                                            |             |       |                       |        |                                                                                                            | 2005 | 1.52        | 2.37  | -0.85                 | -4.29  | 2.59  |
|                                 | Serbia             | 2005                                                                        | 0.26     | 2014               | 0.28     | 9         | 0.02         | 0.00          |                                                                                                            |             |       |                       |        |                                                                                                            | 2005 | 1.19        | 0.92  | 0.26                  | -0.61  | 1.14  |
|                                 | Tajikistan         | 2000                                                                        | 3.03     | 2012               | -0.81    | 12        | -3.83        | -0.32         | 2000                                                                                                       | 26.06       | 23.04 | 3.03                  | -4.37  | 10.43                                                                                                      | 2005 | 10.52       | 15.12 | -4.60                 | -8.68  | -0.52 |
|                                 | Turkmenistan       | 2006                                                                        | 0.53     | 2015               | -0.30    | 9         | -0.84        | -0.09         |                                                                                                            |             |       |                       |        |                                                                                                            | 2006 | 4.71        | 4.17  | 0.53                  | -1.87  | 2.93  |
| Ukraine                         | 2005               | -0.22                                                                       | 2012     | -0.27              | 7        | -0.04     | -0.01        |               |                                                                                                            |             |       |                       |        | 2005                                                                                                       | 0.04 | 0.27        | -0.22 | -0.56                 | 0.12   |       |
| Uzbekistan                      | 2000               | -0.03                                                                       | 2006     | 0.08               | 6        | 0.11      | 0.02         | 2000          | 0.47                                                                                                       | 0.50        | -0.03 | -0.57                 | 0.50   | 2006                                                                                                       | 0.12 | 0.04        | 0.08  | -0.08                 | 0.24   |       |
| Latin America and the Caribbean | Belize             | 2006                                                                        | -4.63    | 2011               | -0.98    | 5         | 3.65         | 0.73          |                                                                                                            |             |       |                       |        |                                                                                                            | 2006 | 3.53        | 8.16  | -4.63                 | -8.74  | -0.53 |
|                                 | Bolivia            | 2000                                                                        | 3.83     | 2008               | 7.13     | 8         | 3.29         | 0.41          | 2000                                                                                                       | 20.78       | 16.95 | 3.83                  | 0.00   | 7.66                                                                                                       | 2008 | 27.99       | 20.87 | 7.13                  | 4.49   | 9.76  |
|                                 | Dominican Rep      | 2000                                                                        | 16.87    | 2014               | 7.83     | 14        | -9.03        | -0.65         | 2000                                                                                                       | 34.54       | 17.67 | 16.87                 | 10.43  | 23.30                                                                                                      | 2007 | 28.94       | 18.96 | 9.98                  | 6.96   | 13.01 |
|                                 | Guyana             | 2000                                                                        | 2.85     | 2014               | 2.31     | 14        | -0.54        | -0.04         | 2000                                                                                                       | 4.26        | 1.41  | 2.85                  | 0.88   | 4.82                                                                                                       | 2006 | 7.62        | 4.11  | 3.51                  | 0.71   | 6.32  |
|                                 | Haiti              | 2005                                                                        | 8.20     | 2012               | 7.84     | 7         | -0.36        | -0.05         |                                                                                                            |             |       |                       |        |                                                                                                            | 2005 | 21.66       | 13.47 | 8.20                  | 4.89   | 11.50 |
|                                 | Honduras           | 2005                                                                        | 2.11     | 2011               | 1.96     | 6         | -0.15        | -0.03         |                                                                                                            |             |       |                       |        |                                                                                                            | 2005 | 7.34        | 5.23  | 2.11                  | 0.96   | 3.26  |
|                                 | Suriname           | 2006                                                                        | 2.56     | 2010               | 1.78     | 4         | -0.78        | -0.20         |                                                                                                            |             |       |                       |        |                                                                                                            | 2006 | 4.97        | 2.41  | 2.56                  | 0.10   | 5.01  |
| Middle East & North Africa      | Iraq               | 2000                                                                        | 1.51     | 2011               | 0.49     | 11        | -1.01        | -0.09         | 2000                                                                                                       | 2.84        | 1.33  | 1.51                  | 0.88   | 2.14                                                                                                       |      |             |       |                       |        |       |
|                                 | State of Palestine | 2010                                                                        | -0.09    | 2014               | -0.26    | 4         | -0.17        | -0.04         |                                                                                                            |             |       |                       |        |                                                                                                            |      |             |       |                       |        |       |
|                                 | Yemen              | 2006                                                                        | 21.77    | 2013               | 24.08    | 7         | 2.31         | 0.33          |                                                                                                            |             |       |                       |        |                                                                                                            | 2006 | 83.62       | 61.85 | 21.77                 | 13.62  | 29.92 |
| South Asia                      | Afghanistan        | 2010                                                                        | 27.00    | 2015               | 27.53    | 5         | 0.52         | 0.10          |                                                                                                            |             |       |                       |        |                                                                                                            |      |             |       |                       |        |       |
|                                 | Bangladesh         | 2006                                                                        | 3.69     | 2014               | 3.50     | 8         | -0.19        | -0.02         |                                                                                                            |             |       |                       |        |                                                                                                            | 2006 | 91.15       | 87.46 | 3.69                  | 2.08   | 5.30  |
|                                 | India              | 2005                                                                        | 24.53    | 2015               | 12.74    | 10        | -11.79       | -1.18         |                                                                                                            |             |       |                       |        |                                                                                                            | 2005 | 65.19       | 40.66 | 24.53                 | 21.76  | 27.31 |
|                                 | Nepal              | 2006                                                                        | 7.92     | 2016               | -3.00    | 10        | -10.92       | -1.09         |                                                                                                            |             |       |                       |        |                                                                                                            | 2006 | 66.03       | 58.11 | 7.92                  | 1.13   | 14.70 |
|                                 | Pakistan           | 2006                                                                        | 8.06     | 2012               | 36.45    | 6         | 28.38        | 4.73          |                                                                                                            |             |       |                       |        |                                                                                                            | 2006 | 75.84       | 67.77 | 8.06                  | 3.37   | 12.76 |



Table S4: Change in urban/rural inequities in the percentage of children under five whose birth is not registered in 67 countries (1999-2016)

| Region                          | Country            | % of children under five whose birth is not registered by iurban/rural residence and urban/rural difference |             |       |                       |        |        | % of children under five whose birth is not registered by iurban/rural residence and urban/rural difference |             |       |                       |        |        | Interval change in urban/rural difference (% points) |             |             |             |             |             |
|---------------------------------|--------------------|-------------------------------------------------------------------------------------------------------------|-------------|-------|-----------------------|--------|--------|-------------------------------------------------------------------------------------------------------------|-------------|-------|-----------------------|--------|--------|------------------------------------------------------|-------------|-------------|-------------|-------------|-------------|
|                                 |                    | Wave 3 (2009-2012)                                                                                          |             |       |                       |        |        | Wave 4 (2013-2015)                                                                                          |             |       |                       |        |        |                                                      |             |             |             |             |             |
|                                 |                    | Year                                                                                                        | Average (%) |       | Difference (% points) |        | 95% CI | Year                                                                                                        | Average (%) |       | Difference (% points) |        | 95% CI | Wave 1 to 2                                          | Wave 2 to 3 | Wave 3 to 4 | Wave 1 to 4 | Wave 2 to 4 | Wave 1 to 3 |
|                                 |                    |                                                                                                             | Rural       | Urban | Estimate              | 95% CI |        |                                                                                                             | Rural       | Urban | Estimate              | 95% CI |        |                                                      |             |             |             |             |             |
| East Asia & Pacific             | Cambodia           | 2010                                                                                                        | 40.12       | 25.59 | 14.53                 | 10.40  | 18.67  | 2014                                                                                                        | 28.44       | 15.63 | 12.81                 | 9.34   | 16.28  |                                                      | 9.21        | -1.72       |             | 7.49        |             |
|                                 | Indonesia          | 2012                                                                                                        | 42.19       | 24.20 | 17.98                 | 15.00  | 20.97  |                                                                                                             |             |       |                       |        |        | -8.30                                                |             |             |             |             |             |
|                                 | Lao                | 2011                                                                                                        | 28.69       | 12.21 | 16.48                 | 13.17  | 19.80  |                                                                                                             |             |       |                       |        |        | -0.44                                                | 1.52        |             |             | 1.07        |             |
|                                 | Mongolia           | 2010                                                                                                        | 0.90        | 1.13  | -0.23                 | -0.92  | 0.46   | 2013                                                                                                        | 0.90        | 0.57  | 0.33                  | -0.11  | 0.77   | -1.26                                                | 0.38        | 0.56        | -0.32       | 0.94        | -0.87       |
|                                 | Myanmar            |                                                                                                             |             |       |                       |        |        | 2015                                                                                                        | 22.31       | 6.11  | 16.20                 | 12.32  | 20.07  |                                                      |             |             | -17.63      |             |             |
|                                 | Thailand           | 2012                                                                                                        | 0.25        | 0.85  | -0.60                 | -1.11  | -0.09  |                                                                                                             |             |       |                       |        |        |                                                      | -0.88       |             |             |             |             |
|                                 | Vietnam            | 2010                                                                                                        | 5.83        | 2.93  | 2.89                  | 0.79   | 4.99   | 2013                                                                                                        | 4.23        | 3.25  | 0.98                  | -0.57  | 2.52   | -15.13                                               | -5.66       | -1.92       | -22.71      | -7.58       | -20.79      |
| Europe & Central Asia           | Albania            |                                                                                                             |             |       |                       |        |        |                                                                                                             |             |       |                       |        |        | 0.76                                                 |             |             |             |             |             |
|                                 | Armenia            | 2010                                                                                                        | 0.00        | 0.71  |                       |        |        |                                                                                                             |             |       |                       |        |        |                                                      |             |             |             |             |             |
|                                 | Azerbaijan         |                                                                                                             |             |       |                       |        |        |                                                                                                             |             |       |                       |        |        | 1.23                                                 |             |             |             |             |             |
|                                 | Kazakhstan         | 2010                                                                                                        | 0.38        | 0.13  | 0.25                  | -0.01  | 0.51   | 2015                                                                                                        | 0.50        | 0.14  | 0.36                  | 0.00   | 0.72   |                                                      | 0.22        | 0.11        |             | 0.33        |             |
|                                 | Kyrgyzstan         | 2012                                                                                                        | 1.87        | 1.12  | 0.75                  | -0.21  | 1.72   | 2014                                                                                                        | 2.60        | 1.49  | 1.11                  | -0.36  | 2.58   |                                                      | -2.04       | 0.36        |             | -1.68       |             |
|                                 | Macedonia          | 2011                                                                                                        | 0.44        | 0.08  | 0.37                  | -0.13  | 0.86   |                                                                                                             |             |       |                       |        |        |                                                      | -1.30       |             |             |             |             |
|                                 | Moldova            | 2012                                                                                                        | 0.52        | 0.27  | 0.25                  | -0.31  | 0.81   |                                                                                                             |             |       |                       |        |        | -0.74                                                | 0.77        |             |             | 0.02        |             |
|                                 | Montenegro         |                                                                                                             |             |       |                       |        |        | 2013                                                                                                        | 0.29        | 0.76  | -0.48                 | -1.37  | 0.42   |                                                      |             |             |             | 0.37        |             |
|                                 | Serbia             | 2010                                                                                                        | 0.75        | 1.36  | -0.62                 | -2.40  | 1.17   | 2014                                                                                                        | 0.76        | 0.48  | 0.28                  | -0.69  | 1.24   |                                                      | -0.88       | 0.89        |             | 0.02        |             |
|                                 | Tajikistan         | 2012                                                                                                        | 11.41       | 12.21 | -0.81                 | -3.82  | 2.21   |                                                                                                             |             |       |                       |        |        | -7.63                                                | 3.80        |             |             | -3.83       |             |
|                                 | Turkmenistan       |                                                                                                             |             |       |                       |        |        | 2015                                                                                                        | 0.31        | 0.62  | -0.30                 | -0.81  | 0.20   |                                                      |             |             |             | -0.84       |             |
| Ukraine                         | 2012               | 0.02                                                                                                        | 0.29        | -0.27 | -0.69                 | 0.15   |        |                                                                                                             |             |       |                       |        |        | -0.04                                                |             |             |             |             |             |
| Uzbekistan                      |                    |                                                                                                             |             |       |                       |        |        |                                                                                                             |             |       |                       |        |        | 0.11                                                 |             |             |             |             |             |
| Latin America and the Caribbean | Belize             | 2011                                                                                                        | 4.38        | 5.37  | -0.98                 | -3.19  | 1.22   |                                                                                                             |             |       |                       |        |        |                                                      | 3.65        |             |             |             |             |
|                                 | Bolivia            |                                                                                                             |             |       |                       |        |        |                                                                                                             |             |       |                       |        |        | 3.29                                                 |             |             |             |             |             |
|                                 | Dominican Rep      |                                                                                                             |             |       |                       |        |        | 2014                                                                                                        | 17.82       | 9.99  | 7.83                  | 5.67   | 10.00  | -6.88                                                |             | -9.03       | -2.15       |             |             |
|                                 | Guyana             | 2009                                                                                                        | 13.01       | 8.90  | 4.11                  | -0.32  | 8.54   | 2014                                                                                                        | 11.83       | 9.53  | 2.31                  | -1.02  | 5.63   | 0.66                                                 | 0.60        | -1.80       | -0.54       | -1.20       | 1.26        |
|                                 | Haiti              | 2012                                                                                                        | 22.87       | 15.03 | 7.84                  | 4.71   | 10.97  |                                                                                                             |             |       |                       |        |        |                                                      | -0.36       |             |             |             |             |
|                                 | Honduras           | 2011                                                                                                        | 7.33        | 5.37  | 1.96                  | 0.74   | 3.18   |                                                                                                             |             |       |                       |        |        |                                                      | -0.15       |             |             |             |             |
| Suriname                        | 2010               | 2.18                                                                                                        | 0.40        | 1.78  | 0.70                  | 2.85   |        |                                                                                                             |             |       |                       |        |        | -0.78                                                |             |             |             |             |             |
| Middle East & North Africa      | Iraq               | 2011                                                                                                        | 1.10        | 0.60  | 0.49                  | 0.19   | 0.80   |                                                                                                             |             |       |                       |        |        |                                                      |             |             |             | -1.01       |             |
|                                 | State of Palestine | 2010                                                                                                        | 0.62        | 0.70  | -0.09                 | -0.59  | 0.42   | 2014                                                                                                        | 0.45        | 0.70  | -0.26                 | -0.76  | 0.25   |                                                      |             | -0.17       |             |             |             |
|                                 | Yemen              |                                                                                                             |             |       |                       |        |        | 2013                                                                                                        | 75.89       | 51.81 | 24.08                 | 20.40  | 27.76  |                                                      |             |             |             | 2.31        |             |
| South Asia                      | Afghanistan        | 2010                                                                                                        | 67.00       | 40.00 | 27.00                 | 21.57  | 32.44  | 2015                                                                                                        | 64.03       | 36.50 | 27.53                 | 21.21  | 33.85  |                                                      |             | 0.52        |             |             |             |
|                                 | Bangladesh         | 2012                                                                                                        | 64.54       | 57.14 | 7.40                  | 4.00   | 10.80  | 2014                                                                                                        | 80.74       | 77.24 | 3.50                  | 0.21   | 6.79   |                                                      | 3.71        | -3.90       |             | -0.19       |             |
|                                 | India              |                                                                                                             |             |       |                       |        |        | 2015                                                                                                        | 23.90       | 11.16 | 12.74                 | 12.01  | 13.48  |                                                      |             |             |             | -11.79      |             |
|                                 | Nepal              | 2011                                                                                                        | 57.94       | 55.81 | 2.14                  | -2.91  | 7.18   | 2016                                                                                                        | 42.17       | 45.17 | -3.00                 | -7.98  | 1.97   |                                                      | -5.78       | -5.14       |             | -10.92      |             |
|                                 | Pakistan           | 2012                                                                                                        | 77.19       | 40.74 | 36.45                 | 30.00  | 42.89  |                                                                                                             |             |       |                       |        |        |                                                      | 28.38       |             |             |             |             |

Table S4: Change in urban/rural inequities in the percentage of children under five whose birth is not registered in 67 countries (1999-2016)

| Region             | Country           | Total change in urban/rural difference between first and most recent survey |          |                    |          |           |              |               | % of children under five whose birth is not registered by urban/rural residence and urban/rural difference |             |       |                       |        | % of children under five whose birth is not registered by urban/rural residence and urban/rural difference |       |             |       |                       |        |       |
|--------------------|-------------------|-----------------------------------------------------------------------------|----------|--------------------|----------|-----------|--------------|---------------|------------------------------------------------------------------------------------------------------------|-------------|-------|-----------------------|--------|------------------------------------------------------------------------------------------------------------|-------|-------------|-------|-----------------------|--------|-------|
|                    |                   | First survey                                                                |          | Most recent survey |          | Change    |              |               | Wave 1 (1999-2004)                                                                                         |             |       |                       |        | Wave 2 (2004-2008)                                                                                         |       |             |       |                       |        |       |
|                    |                   | Year                                                                        | Estimate | Year               | Estimate | Years (n) | Total change | Annual change | Year                                                                                                       | Average (%) |       | Difference (% points) |        |                                                                                                            | Year  | Average (%) |       | Difference (% points) |        |       |
|                    |                   |                                                                             |          |                    |          |           |              |               |                                                                                                            | Rural       | Urban | Estimate              | 95% CI |                                                                                                            |       | Rural       | Urban | Estimate              | 95% CI |       |
| Sub-Saharan Africa | Angola            | 2001                                                                        | 14.44    | 2015               | 19.26    | 14        | 4.82         | 0.34          | 2001                                                                                                       | 80.77       | 66.33 | 14.44                 | 10.72  | 18.16                                                                                                      |       |             |       |                       |        |       |
|                    | Benin             | 2006                                                                        | 14.56    | 2011               | 11.10    | 5         | -3.46        | -0.69         |                                                                                                            |             |       |                       |        |                                                                                                            | 2006  | 51.94       | 37.38 | 14.56                 | 10.30  | 18.82 |
|                    | Burkina Faso      | 2006                                                                        | 27.48    | 2010               | 19.31    | 4         | -8.17        | -2.04         |                                                                                                            |             |       |                       |        |                                                                                                            | 2006  | 41.61       | 14.13 | 27.48                 | 19.23  | 35.73 |
|                    | Burundi           | 2000                                                                        | -3.99    | 2010               | 12.45    | 10        | 16.44        | 1.64          | 2000                                                                                                       | 24.82       | 28.81 | -3.99                 | -12.99 | 5.02                                                                                                       | 2005  | 39.89       | 37.82 | 2.07                  | -5.09  | 9.23  |
|                    | CAR               | 2000                                                                        | 24.42    | 2010               | 26.73    | 10        | 2.31         | 0.23          | 2000                                                                                                       | 36.97       | 12.55 | 24.42                 | 20.82  | 28.02                                                                                                      | 2006  | 64.19       | 27.83 | 36.36                 | 31.80  | 40.91 |
|                    | Cameroon          | 2000                                                                        | -4.10    | 2014               | 31.12    | 14        | 35.22        | 2.52          | 2000                                                                                                       | 64.88       | 68.98 | -4.10                 | -9.96  | 1.76                                                                                                       | 2006  | 42.36       | 14.32 | 28.04                 | 23.39  | 32.69 |
|                    | Chad              | 2000                                                                        | 35.06    | 2014               | 29.23    | 14        | -5.83        | -0.42         | 2000                                                                                                       | 82.51       | 47.44 | 35.06                 | 28.35  | 41.77                                                                                                      |       |             |       |                       |        |       |
|                    | Comoros           | 2000                                                                        | 4.38     | 2012               | 3.07     | 12        | -1.31        | -0.11         | 2000                                                                                                       | 17.49       | 13.11 | 4.38                  | -0.52  | 9.28                                                                                                       |       |             |       |                       |        |       |
|                    | Congo DR          | 2001                                                                        | -6.44    | 2013               | 7.75     | 12        | 14.18        | 1.18          | 2001                                                                                                       | 63.77       | 70.21 | -6.44                 | -13.08 | 0.21                                                                                                       | 2007  | 69.58       | 67.44 | 2.14                  | -5.99  | 10.27 |
|                    | Cote d'Ivoire     | 2000                                                                        | 28.09    | 2011               | 30.94    | 11        | 2.85         | 0.26          | 2000                                                                                                       | 40.09       | 12.00 | 28.09                 | 24.24  | 31.94                                                                                                      | 2006  | 59.47       | 20.75 | 38.72                 | 32.97  | 44.48 |
|                    | Gambia            | 2000                                                                        | 7.65     | 2013               | -0.48    | 13        | -8.13        | -0.63         | 2000                                                                                                       | 70.67       | 63.02 | 7.65                  | -0.88  | 16.17                                                                                                      | 2005  | 46.07       | 42.88 | 3.19                  | -2.05  | 8.44  |
|                    | Ghana             | 2006                                                                        | 26.42    | 2014               | 15.46    | 8         | -10.96       | -1.37         |                                                                                                            |             |       |                       |        |                                                                                                            | 2006  | 57.97       | 31.54 | 26.42                 | 20.27  | 32.58 |
|                    | Guinea Bissau     | 2000                                                                        | -14.97   | 2014               | 16.91    | 14        | 31.89        | 2.28          | 2000                                                                                                       | 53.35       | 68.33 | -14.97                | -20.33 | -9.62                                                                                                      | 2006  | 66.95       | 46.92 | 20.03                 | 15.03  | 25.04 |
|                    | Kenya             | 2008                                                                        | 19.58    | 2014               | 17.80    | 6         | -1.78        | -0.30         |                                                                                                            |             |       |                       |        |                                                                                                            | 2008  | 43.27       | 23.69 | 19.58                 | 12.42  | 26.73 |
|                    | Lesotho           | 2009                                                                        | -2.15    | 2014               | 13.74    | 5         | 15.89        | 3.18          |                                                                                                            |             |       |                       |        |                                                                                                            |       |             |       |                       |        |       |
|                    | Liberia           | 2007                                                                        | 2.45     | 2013               | 9.06     | 6         | 6.61         | 1.10          |                                                                                                            |             |       |                       |        |                                                                                                            | 2007  | 97.17       | 94.72 | 2.45                  | 0.21   | 4.70  |
|                    | Mali              | 2006                                                                        | 30.08    | 2012               | 13.66    | 6         | -16.43       | -2.74         |                                                                                                            |             |       |                       |        |                                                                                                            | 2006  | 55.17       | 25.09 | 30.08                 | 21.85  | 38.32 |
|                    | Mauritania        | 2007                                                                        | 32.78    | 2011               | 26.54    | 4         | -6.24        | -1.56         |                                                                                                            |             |       |                       |        |                                                                                                            | 2007  | 57.63       | 24.85 | 32.78                 | 27.93  | 37.63 |
|                    | Mozambique        | 2008                                                                        | 10.76    | 2011               | 3.75     | 3         | -7.01        | -2.34         |                                                                                                            |             |       |                       |        |                                                                                                            | 2008  | 72.21       | 61.45 | 10.76                 | 5.91   | 15.60 |
|                    | Namibia           | 2006                                                                        | 23.17    | 2013               | 2.99     | 7         | -20.18       | -2.88         |                                                                                                            |             |       |                       |        |                                                                                                            | 2006  | 40.66       | 17.49 | 23.17                 | 19.31  | 27.03 |
|                    | Niger             | 2000                                                                        | 45.00    | 2012               | 32.04    | 12        | -12.96       | -1.08         | 2000                                                                                                       | 60.41       | 15.41 | 45.00                 | 38.50  | 51.51                                                                                                      | 2006  | 75.29       | 29.35 | 45.95                 | 40.27  | 51.63 |
|                    | Nigeria           | 2007                                                                        | 27.70    | 2013               | 31.25    | 6         | 3.56         | 0.59          |                                                                                                            |             |       |                       |        |                                                                                                            | 2007  | 85.06       | 57.36 | 27.70                 | 22.89  | 32.50 |
|                    | Rwanda            | 2005                                                                        | -4.42    | 2014               | -0.67    | 9         | 3.74         | 0.42          |                                                                                                            |             |       |                       |        |                                                                                                            | 2005  | 16.98       | 21.40 | -4.42                 | -8.04  | -0.80 |
|                    | S Tome & Principe | 2000                                                                        | 6.08     | 2014               | 3.39     | 14        | -2.69        | -0.19         | 2000                                                                                                       | 32.92       | 26.84 | 6.08                  | 0.00   | 12.17                                                                                                      | 2008  | 26.21       | 23.62 | 2.58                  | -4.16  | 9.32  |
|                    | Senegal           | 2000                                                                        | 32.64    | 2015               | 29.22    | 15        | -3.42        | -0.23         | 2000                                                                                                       | 45.14       | 12.50 | 32.64                 | 27.49  | 37.80                                                                                                      |       |             |       |                       |        |       |
|                    | Sierra Leone      | 2000                                                                        | 25.53    | 2013               | 3.84     | 13        | -21.70       | -1.67         | 2000                                                                                                       | 59.87       | 34.34 | 25.53                 | 16.57  | 34.50                                                                                                      | 2008  | 52.19       | 40.87 | 11.32                 | 5.23   | 17.42 |
|                    | Swaziland         | 2000                                                                        | 22.90    | 2014               | 12.94    | 14        | -9.96        | -0.71         | 2000                                                                                                       | 50.73       | 27.83 | 22.90                 | 14.65  | 31.15                                                                                                      | 2006  | 71.90       | 61.89 | 10.00                 | 4.00   | 16.01 |
|                    | Tanzania          | 2010                                                                        | 34.57    | 2015               | 33.23    | 5         | -1.34        | -0.27         |                                                                                                            |             |       |                       |        |                                                                                                            |       |             |       |                       |        |       |
|                    | Togo              | 2000                                                                        | 15.17    | 2010               | 22.71    | 10        | 7.54         | 0.753778      | 2000                                                                                                       | 22.04       | 6.87  | 15.17                 | 10.30  | 20.04                                                                                                      | 2006  | 30.69       | 7.21  | 23.48                 | 19.76  | 27.20 |
| Uganda             | 2006              | 2.95                                                                        | 2011     | 9.34               | 5        | 6.39      | 1.28         |               |                                                                                                            |             |       |                       |        | 2006                                                                                                       | 79.30 | 76.36       | 2.95  | -3.42                 | 9.31   |       |
| Zambia             | 1999              | -9.10                                                                       | 2013     | 13.67              | 14       | 22.78     | 1.63         | 1999          | 84.45                                                                                                      | 93.56       | -9.10 | -13.32                | -4.89  | 2007                                                                                                       | 91.38 | 72.33       | 19.05 | 13.95                 | 24.14  |       |
| Zimbabwe           | 2005              | 11.92                                                                       | 2015     | 32.46              | 10       | 20.54     | 2.05         |               |                                                                                                            |             |       |                       |        | 2005                                                                                                       | 29.25 | 17.33       | 11.92 | 7.41                  | 16.42  |       |

Table S4: Change in urban/rural inequities in the percentage of children under five whose birth is not registered in 67 countries (1999-2016)

| Region             | Country           | % of children under five whose birth is not registered by iurban/rural residence and urban/rural difference |             |       |                       |        |        | % of children under five whose birth is not registered by iurban/rural residence and urban/rural difference |             |       |                       |        |        | Interval change in urban/rural difference (% points) |             |             |             |             |             |
|--------------------|-------------------|-------------------------------------------------------------------------------------------------------------|-------------|-------|-----------------------|--------|--------|-------------------------------------------------------------------------------------------------------------|-------------|-------|-----------------------|--------|--------|------------------------------------------------------|-------------|-------------|-------------|-------------|-------------|
|                    |                   | Wave 3 (2009-2012)                                                                                          |             |       |                       |        |        | Wave 4 (2013-2015)                                                                                          |             |       |                       |        |        |                                                      |             |             |             |             |             |
|                    |                   | Year                                                                                                        | Average (%) |       | Difference (% points) |        | 95% CI | Year                                                                                                        | Average (%) |       | Difference (% points) |        | 95% CI | Wave 1 to 2                                          | Wave 2 to 3 | Wave 3 to 4 | Wave 1 to 4 | Wave 2 to 4 | Wave 1 to 3 |
|                    |                   |                                                                                                             | Rural       | Urban | Estimate              | 95% CI |        |                                                                                                             | Rural       | Urban | Estimate              | 95% CI |        |                                                      |             |             |             |             |             |
|                    | Angola            |                                                                                                             |             |       |                       | 2015   | 86.40  | 67.14                                                                                                       | 19.26       | 15.89 | 22.62                 |        |        |                                                      |             |             |             | 4.82        |             |
|                    | Benin             | 2011                                                                                                        | 24.18       | 13.08 | 11.10                 | 8.23   | 13.97  |                                                                                                             |             |       |                       |        |        |                                                      |             |             |             |             |             |
|                    | Burkina Faso      | 2010                                                                                                        | 26.43       | 7.12  | 19.31                 | 16.76  | 21.87  |                                                                                                             |             |       |                       |        |        |                                                      |             |             |             |             |             |
|                    | Burundi           | 2010                                                                                                        | 25.89       | 13.44 | 12.45                 | 8.46   | 16.44  |                                                                                                             |             |       |                       | 6.05   | 10.39  |                                                      |             |             |             |             | 16.44       |
|                    | CAR               | 2010                                                                                                        | 48.38       | 21.65 | 26.73                 | 22.47  | 30.99  |                                                                                                             |             |       |                       | 11.94  | -9.63  |                                                      |             |             |             |             | 2.31        |
|                    | Cameroon          | 2011                                                                                                        | 52.43       | 19.49 | 32.94                 | 28.68  | 37.20  | 2014                                                                                                        | 46.92       | 15.80 | 31.12                 | 26.55  | 35.69  | 32.14                                                | 4.90        | -1.82       | 35.22       | 3.08        | 37.04       |
|                    | Chad              | 2010                                                                                                        | 91.34       | 57.86 | 33.49                 | 29.68  | 37.29  | 2014                                                                                                        | 93.61       | 64.37 | 29.23                 | 25.60  | 32.87  |                                                      |             | -4.25       | -5.83       |             | -1.58       |
|                    | Comoros           | 2012                                                                                                        | 13.55       | 10.48 | 3.07                  | -1.12  | 7.27   |                                                                                                             |             |       |                       |        |        |                                                      |             |             |             |             | -1.31       |
|                    | Congo DR          | 2010                                                                                                        | 70.82       | 76.14 | -5.32                 | -10.74 | 0.10   | 2013                                                                                                        | 77.75       | 70.00 | 7.75                  | 2.46   | 13.03  | 8.58                                                 | -7.46       | 13.07       | 14.18       | 5.61        | 1.11        |
|                    | Cote d'Ivoire     | 2011                                                                                                        | 46.42       | 15.48 | 30.94                 | 26.24  | 35.64  |                                                                                                             |             |       |                       |        |        | 10.64                                                | -7.78       |             |             |             | 2.85        |
|                    | Gambia            |                                                                                                             |             |       |                       |        |        | 2013                                                                                                        | 27.79       | 28.28 | -0.48                 | -5.53  | 4.56   | -4.46                                                |             |             | -8.13       | -3.68       |             |
|                    | Ghana             | 2011                                                                                                        | 44.81       | 28.03 | 16.79                 | 12.31  | 21.27  | 2014                                                                                                        | 36.43       | 20.97 | 15.46                 | 10.03  | 20.89  |                                                      | -9.64       | -1.32       |             |             | -10.96      |
|                    | Guinea Bissau     |                                                                                                             |             |       |                       |        |        | 2014                                                                                                        | 82.46       | 65.55 | 16.91                 | 12.74  | 21.09  | 35.00                                                |             |             | 31.89       | -3.12       |             |
|                    | Kenya             |                                                                                                             |             |       |                       |        |        | 2014                                                                                                        | 39.01       | 21.21 | 17.80                 | 15.03  | 20.56  |                                                      |             |             |             |             | -1.78       |
|                    | Lesotho           | 2009                                                                                                        | 54.45       | 56.61 | -2.15                 | -7.59  | 3.28   | 2014                                                                                                        | 59.87       | 46.13 | 13.74                 | 7.46   | 20.01  |                                                      |             | 15.89       |             |             |             |
| Sub-Saharan Africa | Liberia           |                                                                                                             |             |       |                       |        |        | 2013                                                                                                        | 79.91       | 70.85 | 9.06                  | 4.24   | 13.88  |                                                      |             |             |             | 6.61        |             |
|                    | Mali              | 2012                                                                                                        | 18.27       | 4.62  | 13.66                 | 10.66  | 16.66  |                                                                                                             |             |       |                       |        |        |                                                      |             |             |             |             | -16.43      |
|                    | Mauritania        | 2011                                                                                                        | 51.38       | 24.83 | 26.54                 | 22.49  | 30.59  |                                                                                                             |             |       |                       |        |        |                                                      |             |             |             |             | -6.24       |
|                    | Mozambique        | 2011                                                                                                        | 53.17       | 49.42 | 3.75                  | -0.38  | 7.88   |                                                                                                             |             |       |                       |        |        |                                                      |             |             |             |             | -7.01       |
|                    | Namibia           |                                                                                                             |             |       |                       |        |        | 2013                                                                                                        | 14.04       | 11.05 | 2.99                  | 0.00   | 5.97   |                                                      |             |             |             |             | -20.18      |
|                    | Niger             | 2012                                                                                                        | 40.34       | 8.30  | 32.04                 | 28.40  | 35.68  |                                                                                                             |             |       |                       |        |        | 0.95                                                 | -13.91      |             |             |             | -12.96      |
|                    | Nigeria           | 2011                                                                                                        | 67.83       | 37.15 | 30.68                 | 26.20  | 35.15  | 2013                                                                                                        | 81.44       | 50.18 | 31.25                 | 27.66  | 34.85  |                                                      | 2.98        | 0.58        |             |             | 3.56        |
|                    | Rwanda            | 2010                                                                                                        | 36.38       | 39.58 | -3.20                 | -8.22  | 1.82   | 2014                                                                                                        | 43.90       | 44.57 | -0.67                 | -6.25  | 4.91   |                                                      | 1.22        | 2.53        |             |             | 3.74        |
|                    | S Tome & Principe |                                                                                                             |             |       |                       |        |        | 2014                                                                                                        | 7.03        | 3.64  | 3.39                  | 0.46   | 6.32   | -3.50                                                |             |             | -2.69       | 0.81        |             |
|                    | Senegal           | 2010                                                                                                        | 34.08       | 10.68 | 23.40                 | 19.86  | 26.94  | 2015                                                                                                        | 42.19       | 12.97 | 29.22                 | 24.04  | 34.40  |                                                      |             | 5.82        | -3.42       |             | -9.24       |
|                    | Sierra Leone      | 2010                                                                                                        | 21.86       | 22.39 | -0.52                 | -6.49  | 5.45   | 2013                                                                                                        | 24.24       | 20.40 | 3.84                  | -1.17  | 8.85   | -14.21                                               | -11.85      | 4.36        | -21.70      | -7.49       | -26.06      |
|                    | Swaziland         | 2010                                                                                                        | 53.54       | 38.49 | 15.04                 | 9.38   | 20.70  | 2014                                                                                                        | 49.45       | 36.51 | 12.94                 | 4.41   | 21.46  | -12.90                                               | 5.04        | -2.11       | -9.96       | 2.93        | -7.86       |
|                    | Tanzania          | 2010                                                                                                        | 90.35       | 55.78 | 34.57                 | 28.66  | 40.48  | 2015                                                                                                        | 82.31       | 49.08 | 33.23                 | 28.55  | 37.91  |                                                      |             | -1.34       |             |             |             |
|                    | Togo              | 2010                                                                                                        | 29.39       | 6.68  | 22.71                 | 18.94  | 26.47  |                                                                                                             |             |       |                       |        |        | 8.31                                                 | -0.77       |             |             |             | 7.54        |
|                    | Uganda            | 2011                                                                                                        | 71.32       | 61.98 | 9.34                  | 3.37   | 15.31  |                                                                                                             |             |       |                       |        |        |                                                      | 6.39        |             |             |             |             |
|                    | Zambia            |                                                                                                             |             |       |                       |        |        | 2013                                                                                                        | 93.32       | 79.65 | 13.67                 | 10.39  | 16.96  | 28.15                                                |             |             | 22.78       | -5.37       |             |
|                    | Zimbabwe          | 2010                                                                                                        | 57.31       | 34.81 | 22.50                 | 17.98  | 27.02  | 2015                                                                                                        | 65.75       | 33.29 | 32.46                 | 27.96  | 36.96  |                                                      | 10.58       | 9.96        |             |             | 20.54       |
